# Supplementary material for: An expanded variant list and assembly annotation identifies multiple novel coding and noncoding genes for prostate cancer risk using a normal prostate tissue eQTL data set
Source: PLoS One. 2019 Apr 8;14(4):e0214588. doi: 10.1371/journal.pone.0214588 (PMC6453468; doi:10.1371/journal.pone.0214588)
Supplement: S3 Table — (XLSX) [file pone.0214588.s003.xlsx]

## Sheet: S3 Table
S3 Table. Significant eQTL variants for TAX1BP1.
rsID	Position (hg19)	Minor allele	Major allele	Minor allele frequency in this study	Beta	p-value	FDR	LD with PrCa-risk SNP rs10486567	Defined Prca enhancer1	Factorbook Altered TF motifs2	RegulomeDB score (category 1-3 more likely functional)3	Prostate specific RegulomeDB details3	Defined chromatin states (PrEC)4	Defined chromatin states (PC3)4
rs757137	7:27989343	C	T	0.2547	0.0266882	9.83545e-06	0.000180317	0.82563			No Data		Heterochromatin	Heterochromatin
rs757138	7:27989403	G	T	0.2537	0.0264596	1.17498e-05	0.000201161	0.829112			6		Heterochromatin	Heterochromatin
rs2040668	7:27958773	G	T	0.1996	0.0286368	3.45408e-05	0.000437031	0.725339	Pca.e31.3	GATA1	6		Transcribed	Heterochromatin
rs10486567	7:27976563	A	G	0.2282	0.0264242	3.76049e-05	0.000437031	1	Pca.e31.1	FOXA1:AR/LNCAP-AR-ChIP-Seq/Homer; Nkx3.1(Homeobox)/LNCaP-Nkx3.1-ChIP-Seq(GSE28264)/Homer	3a	AR and SPDEF (VCaP)	Heterochromatin	Heterochromatin
rs7808935	7:27977363	C	T	0.2282	0.0264194	3.78096e-05	0.000437031	1	Pca.e31.1	AP1, NFY	5		Heterochromatin	Heterochromatin
rs67152137	7:27975919	C	G	0.2282	0.0264094	3.81409e-05	0.000437031	0.995423	Pca.e31.1	ELF1, ELK4, GABP, RUNX1	5		Heterochromatin	Heterochromatin
rs739704	7:27989768	A	G	0.2346	0.0253908	4.95499e-05	0.000514197	0.765882			6		Heterochromatin	Heterochromatin
rs150160645	7:27962103	A	G	0.196	0.0283015	5.66006e-05	0.000566006	0.742436			5		Heterochromatin	Heterochromatin
rs67746093	7:27985524	G	C	0.21	0.025378	0.000144601	0.00126239	0.90547			6		Heterochromatin	Heterochromatin
rs147005649	7:27971253	A	G	0.2113	0.0252771	0.000147427	0.00126545	0.918585			No Data		Heterochromatin	Heterochromatin
rs17156041	7:27975745	T	C	0.2113	0.0252485	0.000149553	0.00126545	0.918585	Pca.e31.1	ETS1, STAT1, TAL1	6		Heterochromatin	Heterochromatin
rs11982766	7:27983781	T	C	0.2107	0.0252137	0.000157546	0.00131288	0.914131			6		Heterochromatin	Heterochromatin
rs757136	7:27988939	C	T	0.2102	0.0250616	0.000171458	0.00140749	0.90979			No Data		Heterochromatin	Heterochromatin
rs10807843	7:27992390	C	T	0.2102	0.0250371	0.000174751	0.00141342	0.90979			5		Heterochromatin	Heterochromatin
rs11971132	7:27985867	C	G	0.2114	0.0246189	0.00023027	0.00183548	0.90979			6		Heterochromatin	Heterochromatin
chr7:27953364:D	7:27953364	C	CCTT	0.197	0.0239286	0.000638406	0.00501604	0.733749			6		Heterochromatin	Heterochromatin
kgp6005809	7:27966984	T	C	0.311	0.0183856	0.00130315	0.0100949	0.631275			No Data		Heterochromatin	Heterochromatin
rs62451117	7:27942357	C	T	0.2008	0.0217032	0.00172508	0.0131777	0.614641			No Data		Heterochromatin	Heterochromatin
chr7:27941280:D	7:27941280	A	AT	0.201	0.021622	0.00179739	0.0134946	0.614641			4		Heterochromatin	Heterochromatin
rs9791862	7:27950760	A	G	0.1995	0.0216216	0.00181563	0.0134946	0.618657			No Data		Heterochromatin	Heterochromatin
rs72598552	7:27939961	A	G	0.2012	0.0214712	0.00193169	0.0138695	0.610653			No Data		Heterochromatin	Heterochromatin
rs72598551	7:27939885	T	C	0.2012	0.02146	0.00194173	0.0138695	0.610653			5		Heterochromatin	Heterochromatin
rs62451116	7:27938980	G	A	0.2014	0.0213652	0.00202723	0.0142946	0.610653			5		Heterochromatin	Heterochromatin
rs12666447	7:27937267	T	C	0.2017	0.0211487	0.00222719	0.0153119	0.610653	Pca.e31.2	ELF1, ELK4, ETS1, GABP, TEAD1	4		Heterochromatin	Heterochromatin
rs12668668	7:27936709	G	T	0.2016	0.0210392	0.00236337	0.0160476	0.610653	Pca.e31.2		3a		Heterochromatin	Heterochromatin
rs12666442	7:27937203	T	C	0.2035	0.0208666	0.00248443	0.0161701	0.600216	Pca.e31.2	UA12, UA9	4		Heterochromatin	Heterochromatin
rs62451112	7:27933856	T	C	0.1815	0.01721	0.0175626	0.0685064	0.516335			No Data		Heterochromatin	Heterochromatin
rs79601896	7:28262854	G	A	0.0596	-0.0381548	0.00121514	0.508714	<0.2			6		Heterochromatin	Heterochromatin
rs77166288	7:28305872	G	A	0.0594	-0.0366406	0.00235523	0.600983	<0.2			No Data		Heterochromatin	Heterochromatin
rs861067	7:28267069	A	G	0.2465	-0.0211606	0.00236441	0.600983	<0.2			No Data		Heterochromatin	Heterochromatin
rs849326	7:28273072	G	C	0.1338	-0.0242213	0.0026345	0.624992	<0.2			6		Heterochromatin	Heterochromatin
rs6944995	7:28273719	T	G	0.1336	-0.0240158	0.00309421	0.710371	<0.2			No Data		Heterochromatin	Heterochromatin
rs57458339	7:28309040	C	T	0.2084	-0.0196256	0.00360614	0.772346	<0.2			No Data		Heterochromatin	Heterochromatin
rs187184284	7:27725532	C	G	0.0988	0.0270205	0.00367979	0.772346	<0.2			No Data		Transcribed	Heterochromatin
chr7:27463638:D	7:27463638	A	ACG	0.3378	-0.0194471	0.00393931	0.772346	<0.2			5		Enhancer	Enhancer
rs849324	7:28268797	T	C	0.1826	-0.0204768	0.0045711	0.772346	<0.2			No Data		Heterochromatin	Heterochromatin
chr7:28934248:I	7:28934248	CCG	C	0.223	0.0189518	0.00500212	0.772346	<0.2			No Data		Heterochromatin	Heterochromatin
rs563289	7:28261783	A	C	0.1698	-0.0206456	0.00508562	0.772346	<0.2			No Data		Heterochromatin	Heterochromatin
rs116923356	7:28042749	A	C	0.0379	-0.0435973	0.00522137	0.772346	<0.2			6		Heterochromatin	Heterochromatin
rs562463	7:28274638	G	C	0.1717	-0.0202238	0.00528432	0.772346	<0.2			1f		Heterochromatin	Heterochromatin
rs73084232	7:28924670	G	A	0.2272	0.0185526	0.00544947	0.772346	<0.2			5		Heterochromatin	Heterochromatin
rs11771059	7:28344710	C	T	0.0361	-0.0425712	0.00556464	0.772346	<0.2			No Data		Heterochromatin	Heterochromatin
rs849313	7:28273986	T	C	0.1703	-0.0202909	0.00557099	0.772346	<0.2			No Data		Heterochromatin	Heterochromatin
rs849331	7:28266383	T	C	0.1697	-0.0202843	0.00568782	0.772346	<0.2			5		Heterochromatin	Heterochromatin
rs490609	7:28268045	C	T	0.1716	-0.0201271	0.00586026	0.772346	<0.2			6		Heterochromatin	Heterochromatin
rs493195	7:28270189	A	G	0.1727	-0.0201111	0.00589321	0.772346	<0.2			1f		Heterochromatin	Heterochromatin
rs562558	7:28274668	C	T	0.172	-0.0196774	0.00624405	0.772346	<0.2			6		Heterochromatin	Heterochromatin
rs849325	7:28272666	C	T	0.1762	-0.0195813	0.00655927	0.772346	<0.2			5		Heterochromatin	Heterochromatin
chr7:28925748:D	7:28925748	G	GA	0.2283	0.0181664	0.00656652	0.772346	<0.2			6		Heterochromatin	Heterochromatin
rs62442250	7:28926144	C	T	0.0531	-0.0320757	0.00661243	0.772346	<0.2			No Data		Heterochromatin	Heterochromatin
rs62442252	7:28931437	A	T	0.0531	-0.0320729	0.00661718	0.772346	<0.2			4		Heterochromatin	Heterochromatin
rs117353150	7:28925980	A	G	0.0531	-0.0320619	0.00663703	0.772346	<0.2			6		Heterochromatin	Heterochromatin
rs17671174	7:28924425	C	T	0.2282	0.0181481	0.00665952	0.772346	<0.2			No Data		Heterochromatin	Heterochromatin
rs488837	7:28267876	C	T	0.1773	-0.0194733	0.0067159	0.772346	<0.2			6		Heterochromatin	Heterochromatin
rs538536	7:28267708	G	A	0.1772	-0.0194668	0.00676534	0.772346	<0.2			No Data		Heterochromatin	Heterochromatin
rs11773144	7:28436715	T	G	0.0297	-0.0456689	0.00677903	0.772346	<0.2			No Data		Heterochromatin	Heterochromatin
rs56882475	7:28936736	T	A	0.2305	0.017846	0.00682547	0.772346	<0.2			No Data		Heterochromatin	Heterochromatin
rs849323	7:28268740	A	G	0.175	-0.0194245	0.00718644	0.772346	<0.2			6		Heterochromatin	Heterochromatin
rs13312516	7:28267104	C	T	0.2408	-0.018358	0.00719166	0.772346	<0.2			6		Heterochromatin	Heterochromatin
rs864249	7:28269256	T	C	0.175	-0.0194241	0.00719318	0.772346	<0.2			6		Heterochromatin	Heterochromatin
rs55732416	7:28934249	C	T	0.2325	0.0177483	0.00720871	0.772346	<0.2			No Data		Heterochromatin	Heterochromatin
rs55736408	7:28934251	T	C	0.2325	0.0177474	0.0072111	0.772346	<0.2			No Data		Heterochromatin	Heterochromatin
rs4719959	7:28934503	G	A	0.2325	0.0177449	0.00721886	0.772346	<0.2			5		Heterochromatin	Heterochromatin
rs10225620	7:28492664	A	G	0.2484	0.0164979	0.0072647	0.772346	<0.2			No Data		Heterochromatin	Heterochromatin
rs524193	7:28263352	G	A	0.1752	-0.0192542	0.00747108	0.772346	<0.2			No Data		Heterochromatin	Heterochromatin
rs76194790	7:28493761	T	C	0.2465	0.0166055	0.00749451	0.772346	<0.2			No Data		Heterochromatin	Heterochromatin
rs475615	7:28263825	T	C	0.1753	-0.0192452	0.00755423	0.772346	<0.2			5		Heterochromatin	Heterochromatin
rs502232	7:28263204	C	T	0.1752	-0.0192403	0.00755629	0.772346	<0.2			6		Heterochromatin	Heterochromatin
chr7:28263012:I	7:28263012	A	ACT	0.1752	-0.0192539	0.00756307	0.772346	<0.2			No Data		Heterochromatin	Heterochromatin
rs493961	7:28262326	C	G	0.1751	-0.0192942	0.00758583	0.772346	<0.2			1f		Heterochromatin	Heterochromatin
rs476860	7:28265614	G	T	0.1759	-0.0192681	0.00759649	0.772346	<0.2			1d		Heterochromatin	Heterochromatin
rs561474	7:28274522	A	G	0.1748	-0.0191232	0.00806141	0.788128	<0.2			5		Heterochromatin	Heterochromatin
rs150790263	7:28201674	A	T	0.0307	-0.0494527	0.00808145	0.788128	<0.2			No Data		Heterochromatin	Heterochromatin
rs562202	7:28263515	A	G	0.173	-0.0191788	0.00808393	0.788128	<0.2			No Data		Heterochromatin	Heterochromatin
rs141905836	7:28431372	G	C	0.0287	-0.045424	0.00837446	0.79263	<0.2			No Data		Heterochromatin	Heterochromatin
rs11563579	7:27377120	T	G	0.0774	-0.0276817	0.00840047	0.79263	<0.2			6		Heterochromatin	Heterochromatin
rs73075856	7:28496958	G	A	0.276	0.0160179	0.00846422	0.79263	<0.2			No Data		Heterochromatin	Heterochromatin
rs10251014	7:28012874	A	G	0.0232	-0.0536876	0.00865308	0.799792	<0.2			No Data		Heterochromatin	Heterochromatin
rs4722868	7:28929634	C	T	0.2459	0.0173256	0.00908551	0.828995	<0.2			No Data		Heterochromatin	Heterochromatin
rs12674414	7:28921512	T	C	0.2301	0.0174849	0.0092556	0.833824	<0.2			No Data		Heterochromatin	Heterochromatin
rs62442246	7:28916839	C	T	0.0526	-0.0310604	0.00999697	0.889355	<0.2			No Data		Heterochromatin	Heterochromatin
rs117843271	7:28893000	A	C	0.0152	0.0633942	0.010589	0.930392	<0.2			2b		Repressed	Heterochromatin
rs117621905	7:28048793	C	T	0.0144	0.0713067	0.0109158	0.940691	<0.2			5		Heterochromatin	Heterochromatin
rs2040667	7:27958344	G	A	0.0208	-0.0497035	0.0112736	0.940691	<0.2			6		Transcribed	Heterochromatin
rs73077802	7:28568400	A	G	0.3471	-0.0146097	0.011678	0.940691	<0.2			6		Heterochromatin	Heterochromatin
rs10951188	7:27986773	A	G	0.4129	-0.013848	0.0121237	0.940691	<0.2			No Data		Heterochromatin	Heterochromatin
chr7:27994378:D	7:27994378	C	CTTA	0.4134	-0.0138842	0.0121434	0.940691	<0.2			No Data		Heterochromatin	Heterochromatin
rs10282662	7:27990722	G	C	0.4129	-0.0138303	0.0122163	0.940691	<0.2			6		Heterochromatin	Heterochromatin
rs10244948	7:27988862	G	A	0.413	-0.0138103	0.0122895	0.940691	<0.2			6		Heterochromatin	Heterochromatin
rs1557780	7:27994847	C	T	0.4139	-0.0138482	0.0126875	0.940691	<0.2			5		Heterochromatin	Heterochromatin
rs10248465	7:27993311	G	T	0.4144	-0.0137625	0.0129865	0.940691	<0.2			5		Heterochromatin	Heterochromatin
kgp8534884	7:28003516	C	T	0.3631	0.0138633	0.0131089	0.940691	0.232405			No Data		Heterochromatin	Heterochromatin
rs13312570	7:28267228	C	G	0.3452	-0.0159253	0.0133454	0.940691	<0.2			No Data		Heterochromatin	Heterochromatin
rs191596084	7:28952330	G	A	0.0234	-0.0583292	0.0137486	0.940691	<0.2			6		Heterochromatin	Heterochromatin
rs144762363	7:27780305	A	G	0.0266	0.0449701	0.0149262	0.940691	<0.2			4		Promoter	Promoter
rs4722867	7:28928982	C	T	0.1012	-0.0208928	0.0149298	0.940691	<0.2			3a		Heterochromatin	Heterochromatin
rs77611953	7:27462824	A	C	0.1609	-0.0185422	0.0154737	0.940691	<0.2			No Data		Enhancer	Enhancer
rs144929925	7:28225328	T	C	0.0176	0.0609255	0.0160965	0.940691	<0.2			No Data		Heterochromatin	Heterochromatin
rs160346	7:28565641	A	G	0.3514	-0.0138464	0.0167519	0.940691	<0.2			3a		Heterochromatin	Heterochromatin
rs80138659	7:28910626	T	C	0.0182	-0.051162	0.0179208	0.940691	<0.2			No Data		Heterochromatin	Heterochromatin
1. Hazelett, D.J., Rhie, S.K., Gaddis, M., Yan, C., Lakeland, D.L., Coetzee, S.G., Ellipse, G.-O.N.c., Practical, c., Henderson, B.E., Noushmehr, H., et al. (2014). Comprehensive Functional Annotation of 77 Prostate Cancer Risk Loci. PLOS Genetics 10, e1004102. 2. Wang, J., Zhuang, J., Iyer, S., Lin, X., Whitfield, T.W., Greven, M.C., Pierce, B.G., Dong, X., Kundaje, A., Cheng, Y., et al. (2012).…
